# Supplementary material for: Advancements and challenges in methodological approaches for game-based health interventions: a scoping review
Source: Front Digit Health. 2025 Mar 24;7:1561422. doi: 10.3389/fdgth.2025.1561422 (PMC11973360; doi:10.3389/fdgth.2025.1561422)
Supplement: Supplementary file 6 [file Datasheet6.xlsx]

## Sheet: Article_Evaluation
Title	Reference	Own intervention?	Health outcome?	Game mechanics - SG	Game mechanics - SG-R	Game mechanics - reliability (AG)	Game mechanics - reliability (AG) - R	# of Types of mechanics	GD/Design Theories	Psych/HBC theories	Design theories - SG	Psych/HBC theories - SG	Design theories - AG	Psych/HBC theories - AG	Design theories - AG - R	Psych/HBC theories - AG - R	explicit mention of gamification or similar construct	Length of task	Frequency of sessions	Goal of the task	Summary of task	Method - for developing game/testing its effects	method SG	method AG	method AG - Revised	method SG - Revised	Stage	Mixed Methods	Interdisciplinary	Key results	Sample Sizes	search engine
Mila Blooms: A Mobile Phone Application and Behavioral Intervention for Promoting Physical Activity and a Healthy Diet Among Adolescent Survivors of Childhood Cancer	Fuemmeler, B. F., Holzwarth, E., Sheng, Y., Do, E. K., Miller, C. A., Blatt, J., ... & Østbye, T. (2020). Mila Blooms: a mobile phone application and behavioral intervention for promoting physical activity and a healthy diet among adolescent survivors of childhood cancer. Games for Health Journal, 9(4), 279-289. https://doi.org/10.1089/g4h.2019.0060	yes	weight management	social message network, weekly challenges, game visuals , rewards: point system (each step recorded and food logs) and badges,	social message network, team based aspects, weekly challenges, game visuals (dashboard interface), storyline/narrative, rewards: point system (each step recorded and food logs) and badges, positive feedback on accomplishments, virtual store	Social: messaging, group goals, competition ? ranking (bronze, silver, gold), Performance: weekly challenge (expediiton), Immersion: story / narrative, visuals / visual metaphors (hill), Reinforcement: Points, feedback, badges (bronze, silver, gold), Ecological: currency (marketplace ? virtual store)	Social: messaging, group goals, competition ? ranking (bronze, silver, gold), Performance: weekly challenge (expediiton), Immersion: story / narrative, visuals / visual metaphors (hill), Reinforcement: Points, feedback, badges (bronze, silver, gold), Ecological: currency (marketplace ? virtual store)	5	narrative transportation theory	social cognitive theory (SCT), self-determination theory (SDT)	narrative transportation theory	social cognitive theory (SCT), self-determination theory (SDT)	Narrative transporation theory - importance of visual imagery in a narrative world and storyline.	Social cognitive theory (SCT) - increasing self-efficacy through skill improvement, increasing behavioral capabilities, and social support. Self-Determination theory (SDT) - increasing autonomy, relatedness (feeling valued), and competence / intrinsic motivation.	Narrative transporation theory - importance of visual imagery in a narrative world and storyline.	Social cognitive theory (SCT) - increasing self-efficacy through skill improvement, increasing behavioral capabilities, and social support. Self-Determination theory (SDT) - increasing autonomy, relatedness (feeling valued), and competence / intrinsic motivation.	yes	N/A	8 weeks	provide self-management tools to improve skill development relevant to healthy weight management, a social component to improve social support by allowing players to communicate with one another as well as a coach, and a game context intending to be fun and foster intrinsic motivation for engaging in healthy lifestyle behaviors	eight expeditions: Base Camp, Discovery, Endurance, Stamina, Will Power, Foundation, Team Building, and Fortitude	N/A	paper mock-ups/pilot testing; quasi-experimental, single-group, pretest/posttest, feasibility testing; formative process; interdisciplinary team; interview; biomeasures; focus group; survey	surveys/questionnaire, quasi-experiment (pre/post design); user centered approach; Interviews; user feedback/participant input, patient centered; formative process; feasibility testing	surveys/questionnaire, quasi-experiment (pre/post design); user centered approach; Interviews; user feedback/participant input, patient centered; formative process; biomeasures; feasibility testing; pilot testing	paper mock-ups/pilot testing; quasi-experimental, single-group, pretest/posttest, feasibility testing; formative process; interview; biomeasures; focus group; survey -- add user centered (mention of using feedback to make adjustments)	predevelopment	yes	yes	Majority of participants retained throughout the 8-week intervention (93.8%). Participant satisfaction feedback indicated positive experiences, related to ease of use and enjoyment of the app. Little evidence for behavior change attributable to the app, there was a demonstration of the viability and appeal of the game features, and there were no adverse side effects. Significant pretest to postte…	15	PsycINFO
Developing a Serious Videogame for Preteens to Motivate HPV Vaccination Decision Making: Land of Secret Gardens	Cates, J. R., Fuemmeler, B. F., Diehl, S. J., Stockton, L. L., Porter, J., Ihekweazu, C., ... & Coyne-Beasley, T. (2018). Developing a serious videogame for preteens to motivate HPV vaccination decision making: land of secret gardens. Games for health journal, 7(1), 51-66. https://doi.org/10.1089/g4h.2017.0002	yes	HPV Vaccination	challenges; Leaderboards; Levels; Digital rewards (points, badges); Real-world prizes; Competitions; Social or peer pressure; Self-representation with avatars; three dimensional environments; Narrative context (or story); feedback; ranks; Marketplaces and economies; Teams; Parallel communication; Time pressure.	challenges; Leaderboards; Levels; Digital rewards (points, badges, coins); Real-world prizes; Competitions; Social or peer pressure; Self-representation with avatars; three dimensional environments; Narrative context (or story), exploration; feedback loops; ranks; Marketplaces and economies; Teams; Parallel communication; Time pressure.	-	-	5	user-centered approach	Self-Determination Theory (SDT), Health Belief Model, gain framing over loss framing	user-centered approach	Self-Determination Theory (SDT), Health Belief Model, gain framing over loss framing; cognitive evaluation theory	-	-	-	-	yes	N/A	repeated play	To foster in-game autonomy by posing creative choices in planting a thriving garden, in-game competence by challenging the preteen to master the path to planting a healthy garden shielded from disease by a potion (vaccine), narrative presence through an engaging story line of nurturing seedlings when they are young, and motivation to learn about HPV disease and prevention.	The goal is to plant a lush secret garden and protect the seedlings by treating them when they sprout with a potion to keep them healthy as they mature. Points to buy seeds and create the potion are earned by playing mini-games. Throughout the process of play, players are exposed to messaging about HPV and the benefits of the vaccine.	The team refined the game by generating ideas, creating storyboards, beta testing, monitoring, debugging, evaluating, and updating with new insights; focus groups; interdisciplinary team	iterative process; interdisciplinary team; beta testing; participant input; focus groups; thematic analysis; acceptability	-	-	iterative process; interdisciplinary team; beta testing; participant input; focus groups; thematic analysis; acceptability	predevelopment	no	yes	11–12-year-olds were very willing to discuss their knowledge or lack of knowledge regarding HPV and the vaccination. Used feedback to finish app development. Believe app for education purposes is feasible, did not measure perceived self-efficacy to communicate with parents and providers about HPV vaccination.	9	PsycINFO
Wellness Tribe: Gamification of the IS-WEL Adlerian-Based Model of Wellness	Freund, R. R., Gill, C. S., & Ainbinder, D. L. (2021). Wellness Tribe: Gamification of the IS-WEL Adlerian-Based Model of Wellness. The Journal of Individual Psychology, 77(1), 102-116. https://doi.org/10.1353/jip.2021.0007	yes	holistic wellness	rewards (points, level up), teams, goals	rewards: point system, real-life reward; self-set goals, levels; teams (tribe)	-	-	3	N/A	Indivisible Self model (IS-WEL); Adler’s theory of Individual Psychology; Wheel of Wellness	N/A	Indivisible Self model (IS-WEL); Adler’s theory of Individual Psychology; Wheel of Wellness/wellness theory	-	-	-	-	yes	class period	over the course of a semester	promote wellness and social interest in the classroom; help individuals set and acheive wellness goals	Four wellness elements (Indivisible Self model): the Sage, the Scholar, the Warrior, and the Alchemist. Participants use their group (or “tribe”) in Wellness Tribe to offer and elicit support, feedback, and problem solving in their wellness efforts. They self-assessed their current levels of satisfaction in each element of Wellness Tribe and determined corresponding behaviors that they would find…	Focus group in a graduate class	qualitative case study; participant input; focus group	-	-	qualitative case study; participant input; focus group	postdevelopment	no	no	group bonding in the classroom took place at an accelerated rate compared to past experiences with previous new students. increased cohesion and cooperation. student reports: decrease mood-treating medication prescriptions (at a doctor’s recommendation), interacting actively with course materials rather than reactively, and the like. Others described more effusive results, such as a general incre…	30	PsycINFO
Can a serious game-based cognitive training attenuate cognitive decline related to Alzheimer’s disease? Protocol for a randomized controlled trial	Brill, E., Krebs, C., Falkner, M., Peter, J., Henke, K., Züst, M., ... & Klöppel, S. (2022). Can a serious game-based cognitive training attenuate cognitive decline related to Alzheimer’s disease? Protocol for a randomized controlled trial. BMC psychiatry, 22(1), 1-11. https://bmcpsychiatry.biomedcentral.com/articles/10.1186/s12888-022-04131-7	yes	cognitive functioning affected by AD	narrative, timed events, goal setting, artwork	storyline/narrative; game environment/artwork; individualization through avatar (spirit animal); randomization of games; groups/teams, timed sessions	-	-	3			N/A	N/A	-	-	-	-	no	24 minutes	10 weeks; daily	train cognitive domains typically affected by AD; to investigate the effectiveness CCT on the three cognitive domains typically affected in AD, investigate transfer effects and to explore the neuronal underpinnings of the CCT.	tablet-based training games for three key cognitive domains specifically affected by AD (episodic memory, semantic memory and spatial abilites) & WM.	bi-centric, randomized, placebo-controlled, within and partially blinded three arm design to investigate its effect. Cognitive assessment and neural imaging performed weekly to see if intervention is effective. delivered on a tablet.	experiment/RCT; longitudinal; biomeasures; questionnaires/assessments;	-	-	experiment/RCT; longitudinal; biomeasures; questionnaires/assessments;	development	no	no	restults not released yet	162	PsycINFO
Machine learning and Serious Game for the Early Diagnosis of Alzheimer’s Disease	Mezrar, S., & Bendella, F. (2022). Machine learning and Serious Game for the Early Diagnosis of Alzheimer’s Disease. Simulation & Gaming, 10468781221106850. https://journals.sagepub.com/doi/full/10.1177/10468781221106850	yes	early detection of AD and prediction of disease progression	avatar/character customization, Points, Badges, leaderboards, positive feedback, visual progress tracker, time constraints, main and sub goals	virtual enviorment; individualized avatar; Points, Badges; leaderboards; positive feedback; progress tracker/progress bar; short (sub)/long-term (main) goals; timed tasks	-	-	5		SDT		SDT	-	-	-	-	yes	N/A	1 session	Test cognitive functioning through a set of minigames. The player, over the span of the game, must correctly collect the five ingredients presented at the beginning.	Online virtual simulation of common daily tasks to test working memory, episodic memory, executive functions, visuo-spatial orientation, concentration, attention, and language. Navigation task (follow arrows to supermarket location), shopping task (list of needed items, minigames to earn money), kitchen task (orgnaization of cooking steps), gardening task (select flowers from garden to water).	envrionment made in Unity, score = total cognitive ability, data saved using Unity. 2 phases: data collection; analysis and classification. Conducted pilot testing.	pilot study; participant input; questionnaire;	-	-	pilot study; participant input; questionnaire;	postdevelopment	no	no	The results and tasks of the game were generally satisfactory and acceptable. navigation task most participants found it difficult to follow the arrows to get to the supermarket; found memorization requirements of some tasks too difficult; 92% accuracy for diagnosing	36	PsycINFO
Unlock Me: A Real-World Driven Smartphone Game to Stimulate COVID-19 Awarenes	Phutela, N., Chowdary, A. N., Anchlia, S., Jaisinghani, D., & Gabrani, G. (2022). Unlock Me: A Real-World Driven Smartphone Game to Stimulate COVID-19 Awareness. International journal of human-computer studies, 164, 102818. https://www.ncbi.nlm.nih.gov/pmc/articles/PMC8956355/	yes	Covid 19 knowledge & behaviors	story; rewards (score/points, acheivments); challenge; goals; levels; leaderboards; feedback; timed events	customizable character; leaderboard; score/points; coins; levels; goals per level; virtual environment; acheivements; player statistics; timed levels; story; purchase updates to character	-	-	5	MEEGA+ game evaluation model; input-process-output model	Human-Computer Interaction (HCI) principles	MEEGA+ game evaluation model; input-process-output model; four-dimensional framework; game-based evaluation model (GEM); user-centric methodology	Human-Computer Interaction (HCI) principles	-	-	-	-	no - mention serious games	N/A	1 session	educate about the various COVID-19 norms, precautionary measures, and information throughout the game	The player’s main aim is to catch the violators within the given time frame by creating checkpoints in the game map. While patrolling, the player might encounter COVID-19 bombs.The repercussions of encountering the violators will make the players realize the importance of social distancing. The COVID-19 bombs will educate the users about the infection left over the surfaces by covid infected peop…	user-centered approach to development - consists of early focus on end-users, tasks and measuring user reactions at every stage. Feedback at every stage of development by having individuals from 3 different age groups play the game. 4 phases of development: discover, define, develop and deliver. Used Unity engine. Evaluated efficacy 2 phases: large scale evaluation of the initial prototype of; ch…	user feedback/participant input (interviews, surveys, observations - Qual); prototypes; iterative process; activity based planning; evaluation study (pre/during assessments)	-	-	user feedback/participant input (interviews, surveys, observations - Qual); prototypes; iterative process; activity based planning; evaluation study (pre/during assessments)	postdevelopment	no	no	17-21 years age group show an increase in learning by 53% over a short period of the experiment; 51% liked the Aesthetics; 55% of the players felt that the game was easy to learn; 58% of them agreed that the game was operable; 48% of the players agreed that the game was accessible; the game has a good user error protection factor; 57% of the players felt confident and had a feeling of mastery aft…	207	PsycINFO
Assistive HCI-Serious Games Co-design Insights: The Case Study of i-PROGNOSIS Personalized Game Suite for Parkinson’s Disease	Dias, S. B., Diniz, J. A., Konstantinidis, E., Savvidis, T., Zilidou, V., Bamidis, P. D., ... & Hadjileontiadis, L. J. (2021). Assistive HCI-serious games co-design insights: the case study of i-PROGNOSIS personalized game suite for Parkinson’s disease. Frontiers in Psychology, 11, 4017. https://www.frontiersin.org/articles/10.3389/fpsyg.2020.612835/full	Yes, project draws from the PD related i-PROGNOSIS Personalized Game Suite (PGS) (www.i-prognosis.eu); use Exergames (exercise based), Dietarygames (Dietary habits), Emotional games (emotional aspects), Handwriting games, and Voice games from this suite. Qualtative feedback from semi-structured interviews used to refine the scenarios.	Several: exercise (Walk movement, gait freeze, presence of tremor, bradykinesia, rigidity, limited range of motion, balance and coordination, abnormal posture); dietary (Dysphagia, compulsive eating behavior, anosmia, constipation); emotional (Depression, hypomimia, loss of self-confidence, feelings of shame, anxiety, deterioration of body image, embarrassment and stress, social isolation, decrea…	Game goals, Game rules and gameplay, Game plot/story, Game options, Levels of challenge, Game surprises, Game causalities, and Transfer into real life (mentioned under game mechanics, but treated as a DV/outcome)	goals; story/narrative, surprises (); levels;	-	-	3	Game-Based Learning (GBL) design framework by Shi & Shih (2015)	brief mention of behaviorism, constructivism, cognitivism, psychology, as perspectives informing HCI-SGs design	Game-Based Learning (GBL) design framework by Shi & Shih (2015); Personalized holistic approach/co-creation; Game-based Assessment (GBA) approach	brief mention of behaviorism, constructivism, cognitivism, as perspectives informing HCI-SGs design; human-centered interaction (HCI)	-	-	-	-	yes - gamified appraoch	N/A	N/A	Explores design elements in assistive HCI-SGs (Human Computer Interaction - Serious Games) for Parkinson’s Disease (PD) patients.	Semi-structured interviews: Ten PD patients and four clinicians viewed videos of 14 PGS game-scenarios on a tablet and then gave feedback, using a semi-structured interview. Survey: 104 participants who were potential stakeholders (40 PD patients, but also health care professionals, researchers, etc) completed web survey disseminated, presumably after game play (this part is not explicit)	Co-creation process that uses feedback from target population and other stake holders: The researchers used qualitative feedback from interview participants and quantitative feedback from surveys to refine game design elements and identify game mechanics that were effective. Participans were therefore co-creators and active contributors to the design process.	multi stage/step; storyboard/prototype; co-creation / participant input; surveys; feasibility testing; interviews; interdisciplinary	-	-	multi stage/step; storyboard/prototype; co-creation / participant input; surveys; feasibility testing; interviews; interdisciplinary	predevelopment	yes	yes	Various game mechanic parameters (e.g., clear rules, being able to complete goals, enough options, interesting options, enough surprises) evaluated in the survey were predictive of participants evaluation of how important they were for transfering the skills targeted by the games to real life (DV: transfer to real life). The factors that were significant differed somewhat by type of game (exercis…	118	PsycINFO								0
Using Serious Games for Antismoking Health Campaigns: Experimental Study	Kim, J., Song, H., Merrill Jr, K., Jung, Y., & Kwon, R. J. (2020). Using serious games for antismoking health campaigns: Experimental study. JMIR Serious Games, 8(4), e18528. https://games.jmir.org/2020/4/e18528/	yes	stop smoking	story; points (health); time limit; decision consequences; levels	narrative; virtual environment; levels; rewards (score) and consequences (story changes); avatar; feedback; time limit	-	-	4		enactive and vicarious learning; interactive tailoring	The Proteus Effect; Entertainment-Education (E-E); Extended Elaboration Likelihood Model	Social Cognitive Theory (enactive and vicarious learning; interactive tailoring); Protection Motivation Theory (PMT); parallel process model/EPPM	-	-	-	-	no - serious games	N/A	1 session	educate on smoking risks	flash-based single-player game where users are asked to avoid smoking cigarettes when they are stressed out because of an upcoming exam (Level 1) and when they are hanging out at a bar (Level 2).	Compared game to brochure to test efficacy (experimental study). Tested smoking perceptions and intentions to quit.	experiment; multi step; pretest/posttest;	-	-	experiment; multi step; pretest/posttest;	development	no	no	individuals in the game condition, compared to those in the print condition, reported significantly more negative attitudes toward social smoking; no significant difference in the intention to quit smoking between the game condition and the print condition; individuals in the game condition reported a greater level of susceptibility than those in the print condition; the differences between the p…	72	PsycINFO
Improving instruction and sexual health literacy with serious games and gamification interventions: an outlook to students’ learning outcomes and gender differences	Haruna, H., Zainuddin, Z., Okoye, K., Mellecker, R. R., Hu, X., Chu, S. K. W., & Hosseini, S. (2021). Improving instruction and sexual health literacy with serious games and gamification interventions: an outlook to students’ learning outcomes and gender differences. Interactive Learning Environments, 1-19. https://www.tandfonline.com/doi/full/10.1080/10494820.2021.1888754	yes (serious game + gamification - 2 separate)	sexual health promotion	Gamification: badges, scores, levels, leaderboards, and points; competition; immediate feedback; time limit	serious game: goals (learning objectives); avatars, virtual environment; discussion w/ in-game character; points/score; competition; leaderboard; time limit; levels; consequence/point deduction Gamification: badges; score/points; levels; leaderboard; progression view	-	-	5		participatory design-based research	participatory design-based research	self-regulation learning approach	-	-	-	-	yes	40 minutes	five weeks, once a week	Deliver sexual health promotion lessons and knowledge evaluation	Serious Game: Five topics on sexual health promotion (1 topic a week). Each topic contained introduction and learning objectives that the students are supposed to learn at the end of the gameplay. the game scenarios were presented in the form of avatars of students and a teacher in a classroom.After playing the scenario, students were asked to perform a set of learning activities presented in the…	Multistage method: feasability (collect info best teaching methods), focus group (participants), focus group (stakeholders), final creation of materials, pre-test for participants and and orientation for how to use the learning systems, implementation, post test for participants	quasi-experimental; pre-test/post-test; multi-stage; community engaged; interdisciplinary team; feasibility; focus group (meeting with teachers)	-	-	quasi-experimental; pre-test/post-test; multi-stage; community engaged; interdisciplinary team; feasibility; focus group (meeting with teachers)	development	yes	yes	For all three interventions (normal, gamification, serious game) improvement from pre to post test. Students in serious game and gamification showed more improvement (no sig difference between serious game and gamification). No gender difference.	108	PsycINFO
Treating Childhood Social Anxiety Disorder With Virtual Environments and Serious Games: A Randomized Trial	Beidel, D. C., Tuerk, P. W., Spitalnick, J., Bowers, C. A., & Morrison, K. (2021). Treating childhood social anxiety disorder with virtual environments and serious games: a randomized trial. Behavior Therapy, 52(6), 1351-1363. https://doi.org/10.1016/j.beth.2021.03.003	Yes (Pegasys VR augments Social Effectiveness Therapy for Children, Social skills training program (Pegasys-VR) with artificially intelligent avatars, web based -- remake of pegasys, ipa) System expands on the one described in the row below (Wong Sarver et al.) in that it uses AI instead of Wizard of Oz	social anxiety disorder symptoms (based on self-report, parental report, clinician ratings, and behavioral assessments); [social skills targetted: initiating conversations, listening, cellphone skills, etc.]	virtual environment of school, avatars (student, principal, teacher, etc.), free roam locomotion throughout the virtual environment; dosing and practice of tasks (homework); (Artificial Intelligence for responses: AI mechanics include: chat scripts, pattern matching, Markov processes, ontologies, and "language tricks"); also log analyses methods to improve conversation	virtual environment; interaction with virtual characters (AI); exploration; groups	-	-	2	agile development with industry processes selected (pre-prototyping, repetitive prototyping, acceptance testing with ecologically valid populations)		agile development with industry processes selected (pre-prototyping, repetitive prototyping, acceptance testing with ecologically valid populations); Markov processes		-	-	-	-	no - serious games	2 hours	2 times per week for 12 sessions	optimize the dissemination of this intervention across treatment settings (e.g., at school, outpatient, or community facilities), address shortcomings of original design; compare original SET-C (Social Effectiveness Therapy for Children) program to a revised version that uses the Pegasys-VR app.	utilized artificial intelligence to replace the Wizard of Oz interface - use of AI replaced use of clinicians. virtual environment was expanded to include an entire school, with multiple classrooms, a science lab, cafeteria, gym, hallways, vestibules, lockers, and outside areas, including a playground, snack area, and green space native to a school setting. The revised platform also operationaliz…	randomized control trial; pre/post design; 7 to 12 year olds with SAD; 42 children enrolled in study (26 Pegasys group; 16 SET-C group); 4 dropped out (final 25 + 13); Measurement: self assessment, parent assesment, clinicial assessment, behavioral assessment (Different scales for each one)	feasibility; multiple phases; user feedback; interviews; RCT	-	-	feasibility; multiple phases; user feedback; interviews; RCT	development	yes	no	There were no significant group differences on any measure at pretreatment: both programs were equally efficacious in decreasing anxiety and improving social skill in social encounters. children and clinicians were satisfied with the technology and rated it as credible and easy to use. Parents were satisfied and indicated that they would recommend it to their family and friends. Children who were…	43	PsycINFO
The Feasibility and Acceptability of Virtual Environments in the Treatment of Childhood Social Anxiety Disorder	Wong Sarver, N., Beidel, D. C., & Spitalnick, J. S. (2014). The feasibility and acceptability of virtual environments in the treatment of childhood social anxiety disorder. Journal of Clinical Child & Adolescent Psychology, 43(1), 63-73. https://doi.org/10.1080/15374416.2013.843461	yes, calls it an "environment" (Same one as the one above; this was an earlier feasibility study)	reduce social anxiety in those with social anxiety disorder	prototype: levels; revisions: narrated storyline, feedback, badges, virtual environment of school, avatars (student, principal, teacher, etc.), (Wizard of Oz interface: clinicians select responses that drive the interaction)	virtual envrionment; levels; tracking; interaction w/ in-game characters; exploration; avatar; --added after feasibility story/narrative; badges	Immersion (story/narrative [interactions in a school setting], environment, exploration? [within this environment]); Performance (levels [each area has 3 different skill levels, varying in interactional difficulty of social skills used], tracking [homework tracking to monitor compliance with VE practice at home]); Ecological (dosing? [mention of dose-controlled strategy used by therapist at in-cl…	Immersion (story/narrative [interactions in a school setting], environment, exploration? [within this environment]); Performance (levels [each area has 3 different skill levels, varying in interactional difficulty of social skills used], tracking [homework tracking to monitor compliance with VE practice at home]); feedback? [unclear if there's feedback to homework or to practice scenarios; presum…	3	N/A	Social Effectiveness Therapy	N/A	Social Effectiveness Therapy	N/A	Social Effectiveness Therapy for Children: a psychosocial treatment that includes - exposure therapy, social skills training, peer generalization strategies, and homework practice. (Exposure therapy, a component of this framework can be considered a theoretical framework. Similarly, social skills training is framed as an extension of cognitive behavior therapy to target social skills. Skill gener…	N/A	Social Effectiveness Therapy for Children: a psychosocial treatment that includes - exposure therapy, social skills training, peer generalization strategies, and homework practice. (Exposure therapy, a component of this framework can be considered a theoretical framework. Similarly, social skills training is framed as an extension of cognitive behavior therapy to target social skills. Skill gener…	no	~30-40 minutes	12 weeks, once per week (with therapist), 3 times per week (at home)	provide practice interactions with people who differed in age, sex, race/ethnicity, roles; while minimizing the need for formal peer group activities in the clinic or intensive parental involvement at home.	In a school setting; practice four areas of social skill: greetings and initiating conversations, maintaining conversations through asking questions, giving and receiving compliments, and assertiveness. 3 levels; 744 unique dialogue responses	Interdisciplinary collaboration (psychology, engineering, computer programming, gaming, and art). Broke development down in to phases (phase 1: prototype, phase 2: testing), currently in phase 2. Phase 1 consisted of specifying the different skills modules and levels, description of the visual environment and characters, creating the verbal dialogue and nonverbal responses for each character; the…	interdisciplinary team; feasibility; video recordings; acceptibility; surveys; credibility	surveys/questionnaire; feasibility testing, acceptability, credibility	surveys/questionnaire; video recording; feasibility testing, acceptability, credibility	interdisciplinary team; feasibility; video recordings; acceptibility; surveys; credibility	predevelopment	yes	yes	Feasibility: 90% had access, 36% needed technical support, 27% needed to borrow technology; acceptibility: 73% completed, 75% would recommend, 3% skipped some at home sessions; credibility: 100% rated it as logical in decreasing anxious distress, and 88% believed that the treatment would specifically help them become less anxious, 75% also reported this treatment as helping them improve other are…	11	PsycINFO
Stigma-Stop: A Serious Game against the Stigma toward Mental Health in Educational Settings	Cangas, A. J., Navarro, N., Parra, J. M., Ojeda, J. J., Cangas, D., Piedra, J. A., & Gallego, J. (2017). Stigma-stop: a serious game against the stigma toward mental health in educational settings. Frontiers in psychology, 8, 1385. https://www.frontiersin.org/articles/10.3389/fpsyg.2017.01385/full	yes	reduce stigma for common mental health orders	personalization (choose avatar)	overall game: virtual enviornment; avatar; goal; exploration; feedback; reward (get to play minigames) minigames: virtual environment;	-	-	3			N/A	N/A	-	-	-	-	no - serious games	1 hr	1 session	enable young people to become familiar with mental disorders by increasing their knowledge and comprehension; demonstrate examples of how to react in different situations, promoting interest in actively helping individuals with certain disorders.	The video game presents four of the most common disorders among young people, two of which are considered common mental illnesses (i.e., depression and agoraphobia), while the other two are serious (i.e., schizophrenia and bipolar disorder). developed with Unity3D software for three platforms: PC, website, and Smartphone application. 4 characters each with one of the 4 disorders. The objective of…	Unity3D, Artificial intelligence was used to control some aspects of the game; the study was carried out over the course of 3 months; students answered the Questionnaire on student attitudes toward schizophrenia both before contact with Stigma-Stop and after; also asked to evaluate the usefulness and visual appeal of the program	questionnaire/survey; pre/post test; random group assignment; previously validated	-	-	questionnaire/survey; pre/post test; random group assignment; previously validated	post development	no	no	there was a considerable decrease among the participants who used the serious game in stigma; most students responded that they would be able to help individuals with disorders regarded as common; participants scored close to eight points (7.8) for the game’s usefulness and a slightly lower score for interest (average score of 6.3); 75% stated they would recommend trying this game to a friend	552	PsycINFO
Methodology of an exercise intervention program using social incentives and gamification for obese children	Fang, Y., Ma, Y., Mo, D., Zhang, S., Xiang, M., & Zhang, Z. (2019). Methodology of an exercise intervention program using social incentives and gamification for obese children. BMC Public Health, 19(1), 1-10. https://pubmed.ncbi.nlm.nih.gov/31159776/	yes	increase physical activity, lose weight	Points, ranking, badges, punishment and reward	points; rankings, teams, badges; punishment (performance); real world reward (diploma); competition; feedback	-	-	2	gamification theory	social incentive theory	N/A	social incentive theory	-	-	-	-	yes	N/A	6 months	To assess the effectiveness of a ‘S&G exercise intervention’ to improve metabolic health; test the effect of this innovative exercise intervention on healthy behaviors changes such as PA, diet, sleep health and screen media use; improve metabolic health and unhealthy behaviors in obese children.	WeChat as the social media platform to carry out the intervention. A WeChat group is created for each group by the investigators. Weekly activities: The activity consists of four parts, including peer support, daily report, the weekend competition and tip reading. Daily tasks. Every weekend, each team will hold a rope skipping competition online (or offline for their convenient) in order to stimu…	Participants were randomly assigned to either an intervention or a control group.	RCT; assess effectiveness; credibility; pre/post measures; longitudinal; bio measures; survey;	-	-	RCT; assess effectiveness; credibility; pre/post measures; longitudinal; bio measures; survey;	development	no	no	no results yet	420	PubMed
Mobile health-based gamification intervention to increase physical activity participation among patients with coronary heart disease: study protocol of a randomised controlled trial	Xu, L., Li, J., Zhang, X., Pang, Y., Yu, T., Lian, X., ... & Li, F. (2022). Mobile health-based gamification intervention to increase physical activity participation among patients with coronary heart disease: study protocol of a randomised controlled trial. BMJ open, 12(1), e054623. https://pubmed.ncbi.nlm.nih.gov/35105640/	yes	participation in physical activity and evaluate the effects on biomedical and lifestyle-related risk factors, intrinsic motivation, enjoyment, competence, autonomy, and relatedness, social support, and mental health	poins, rewards, levels, feedback, collaboration, goal setting	feedback, points (gain and loss), levels; teams; real life reward (prize); goals	-	-	3		Behavioural economics principles (precommitment, fresh start effect, goal gradients, loss aversion, anticipated regret and social norms)	N/A	Behavioural economics principles (precommitment, fresh start effect, goal gradients, loss aversion, anticipated regret and social norms); self-determination theory	-	-	-	-	yes	N/A	12 weeks	increase weekly step count, change risk factors (weight, bmi, etc)	gamification WeChat applet named ‘TahneeWeh’	semi-structured interview after the intervention to comprehend patients’ satisfaction, perceptions and their experience on the intervention. single-blind, three-arm randomised controlled trial: Control group: WeChat applet+step goal setting; Individual group: WeChat applet+step goal setting+gamification; Team group: WeChat applet+step goal setting+gamification+collaboration. Weekly goals, points …	RCT; longitudinal; interview, bio measures; questionnaire; pre/post assessment; usability; interdisciplinary team;	-	-	RCT; longitudinal; interview, bio measures; questionnaire; pre/post assessment; usability; interdisciplinary team;	development	yes	yes	no results yet	108	PubMed
The effect of an online exercise programme on bone health in paediatric cancer survivors (iBoneFIT): study protocol of a multi-centre randomized controlled trial	Gil-Cosano, J. J., Ubago-Guisado, E., Sánchez, M. J., Ortega-Acosta, M. J., Mateos, M. E., Benito-Bernal, A. I., ... & Gracia-Marco, L. (2020). The effect of an online exercise programme on bone health in paediatric cancer survivors (iBoneFIT): study protocol of a multi-centre randomized controlled trial. BMC public health, 20(1), 1-13. https://www.ncbi.nlm.nih.gov/pmc/articles/PMC7545891/	yes	exercise, bone health	points, rankings	points; rankings; feedback; goals	-	-	3		Consensus on Exercise Reporting Template (CERT) criteria; five behaviour change techniques (i.e. action planning and goal setting, providing instructions and demonstrations of how to perform the behaviour, self-monitoring of behaviour, providing feedback on performance and information about health consequences)	N\A	five behaviour change techniques (i.e. action planning and goal setting, providing instructions and demonstrations of how to perform the behaviour, self-monitoring of behaviour, providing feedback on performance and information about health consequences) - behavior change theory	-	-	-	-	yes	20 minutes	3 days per week for 9 months	Engage patients in jump training and increase exercise	3 phases targetting different exercise regimes. Delivered through whatsapp	Recruit patients to participate in 9 month intervention. Compare intervention to control group. Longitudinal data, assess bone health at baseline, after 9 months, 4 months after completion of intervention. --no prototyping or focus groups. --no support or detailed explanation of the point system (primary game mechanic)	RCT; longitudinal; pre/post test; bio measures; interdisciplinary team - key informant; qeustionnaire	-	-	RCT; longitudinal; pre/post test; bio measures; interdisciplinary team - key informant; qeustionnaire	post development	no	yes	no results yet	116	PubMed
The effect of social support features and gamification on a Web-based intervention for rheumatoid arthritis patients: randomized controlled trial	Allam, A., Kostova, Z., Nakamoto, K., & Schulz, P. J. (2015). The effect of social support features and gamification on a Web-based intervention for rheumatoid arthritis patients: randomized controlled trial. Journal of medical Internet research, 17(1), e3510. https://www.ncbi.nlm.nih.gov/pmc/articles/PMC4296094/	yes (at an earlier stage, "We developed developed ONESELF in collaboration with the doctors of the Swiss Rheumatology Association."). intervention is: ONESELF, a Web-based intervention designed and operated for chronically ill patients with RA	Primary: physical activity, health care utilization, prescription medication overuse; Secondary: RA knowledge; empowerment	rewards: badges/medals (immediate and delayed); leaderboard	points; badges; medals (delayed); rank; statistics a/b performance; real world prize	Social (competition, leaderboard [real prize for for the top 5 users at the end of the intervention], social messaging [posting in a forum]); Reinforcement (points (for posting, blogging, answering quick questions, viewing sections), badges / medals); Ecological? (timed events: immediate vs. delayed points)	Social (competition, leaderboard [real prize for for the top 5 users at the end of the intervention], social messaging [posting in a forum]); Reinforcement (points (for posting, blogging, answering quick questions, viewing sections; immediate and delayed), badges / medals);	3	None!	None!	N/A	N/A	N/A	N/A "empowerment and self-management" discussed as elements of past interventions in the literature social support (Different distinctions discussed: structural (availability of support) vs. functional (perception of support); informational, emotional, and instrumental) (Theories or just relevant psychological constructs? I'm inclined to say the latter.) "inspired by the model-driven approach of …	N/A	N/A	yes	N/A	~2-4 months	Examine effect of Web-based intervention (specifically, social support features and gamification) on various outcomes in rheumatoid arthritis patients (physical activity, health care utilization, medication overuse, empowerment, and RA knowledge). Also, evaluate the effect of gamification on website use.	Randomized control trial: 5-armed with 1 control and 4 experimental conditions; single blinded experiment with repeated measures design. Intervention administered via Website.	Randomized control trial: RA patients assigned to 1 control or 4 experimental conditions with varying access to social support and gamification features on website.	RCT; longitudinal; pre/post test; questionnaires; interdisciplinary team; prototype (past); pilot study (past); qualitative (past); patient centered; multiple phases/studies; model-driven approach;	RCT; survey; (pilot study previously conducted)	RCT; survey; patient-centered; multiple phases/studies; model-driven approach (pilot study previously conducted)	RCT; longitudinal; pre/post test; questionnaires; interdisciplinary team; prototype (past); pilot study (past); qualitative (past); patient centered; multiple phases/studies; model-driven approach;	development	yes	yes	Compared to control group, physical activity over time increased and health care utilization decreased for patients with access to social support + gaming. Gamification increased use of the website. NOTE: Gamification is used in conjunction with Social support forums/chatrooms on website.	157	elicit
Gamification as an approach to improve resilience and reduce attrition in mobile mental health interventions: A randomized controlled trial	Litvin, S., Saunders, R., Maier, M. A., & Lüttke, S. (2020). Gamification as an approach to improve resilience and reduce attrition in mobile mental health interventions: a randomized controlled trial. PloS one, 15(9), https://journals.plos.org/plosone/article?id=10.1371/journal.pone.0237220#sec003e0237220.	yes	well being (resilience; positive relationships with others; personal growth; anxiety); attrition from the program	(1) Levels: one level a week where the player has to learn two skills and implement them correctly in a choose your own adventure story in order to unlock the following level; (2) progress feedback in the form of a “progress island map”; (3) points as coins; (4) varying narratives for each level; (5) personalization as generalized feedback of their Big Five personality type; (6) customization in …	levels; progress map; points; narrative; badges; feedback	-	-	3	None (just cite Tondello et al. Elements of gameful design emerging from user preferences.)	Not explicitly; broadly address autonomy and competence. (e.g., "Although the specific psychological and neural mechanisms require further research, it is assumed that gamification enhances intrinsic motivation by satisfying basic psychological needs of autonomy, competence, and relatedness."). Focus also on resilience: "it is reasonable to assume that promoting well-being and resilience is relev…	gameful design	Social-determination theory, resilience	-	-	-	-	yes	10 minutes	5 weeks, weekly	Increase engagement with prevention and early-stage mobile interventions for mental health	Randomized control trial: 3-armed (eQuoo, “treatment as usual” cognitive behavioral therapy journal app, no-intervention waitlist); repeated measures (data collected on days 1, 17, 35); For the app group: psychoeducational tutorials from an avatar Dr. to master skills; then, a "choose your own adventure" scenario becomes available to apply that skill. Skills target concepts: emotional bids. gener…	N/A	RCT; questionnaires; longitudinal; pre/post;	-	-	RCT; questionnaires; longitudinal; pre/post;	post development	no	no	Compared to the 2 control groups, significant increases (over the 5 weeks) in resilience, personal growth, positive relations, and reduced anxiety in the gamification app group. The app group also had more adherence than the control or waitlist groups.	358	elicit
Smartphone-based gamification intervention to increase physical activity participation among patients with coronary heart disease: intermediate results of a randomized controlled trial	Xu, L., Li, F., & Dendale, P. (2022). Smartphone-based gamification intervention to increase physical activity participation among patients with coronary heart disease: intermediate results of a randomized controlled trial. European Journal of Cardiovascular Nursing, 21(Supplement_1), https://doi.org/10.1177/1357633X221150943	yes	physical activity - coronary heart disease	points, levels, rewards	points, levels, rewards; teams	-	-	3		Behavioral economics principles; Self-Determination Theory	n/a	behavioral economics;	-	-	-	-	yes	N/A	12 weeks	Increase daily steps	WeChat applet called “TahneeWeh”. individual and team groups. In the individual group, patients maintained points and levels and received rewards based on their step counts. Patients in the team group had to cooperate with other team members to maintain points and levels and receive rewards. Points allotted at the beginning of every week, taken away if daily goals not met. Move up/down in levels …	single-blind, randomized, controlled trial with three arms to evaluate the effects of a smartphone-based gamification intervention on PA participation, biomedical and lifestyle-related risk factors, intrinsic motivation, enjoyment, competence, autonomy, relatedness, social support, and mental health.	RCT; longitudinal; biomeasures; questionnaires	-	-	RCT; longitudinal; biomeasures; questionnaires	development	no	no	for the individual group, smartphone-based gamification intervention significantly increased PA among CHD patients over the 12-week period and had a good maintenance effect during the follow-up period. Patients also had a significant increase in competence and autonomous motivation and a significant decrease in BMI and waist circumference in 12 weeks. For the team group, gamification intervention…	108	elicit
Effect of Goal-Setting Approaches Within a Gamification Intervention to Increase Physical Activity Among Economically Disadvantaged Adults at Elevated Risk for Major Adverse Cardiovascular Events: The ENGAGE Randomized Clinical Trial.	Patel, M. S., Bachireddy, C., Small, D. S., Harrison, J. D., Harrington, T. O., Oon, A. L., ... & Volpp, K. G. (2021). Effect of Goal-Setting approaches within a Gamification intervention to increase physical activity among Economically disadvantaged adults at elevated risk for major adverse cardiovascular events: the engage randomized clinical trial. JAMA cardiology, 6(12), 1387-1396. https://do…	yes; 4 gamification interventions varying in goal setting mechanic **uses Way to Health**	increase physical activity; cardiovascular disease	goal setting (self-chosen or assigned; immediately or gradually); feedback; levels, points, punishments (lose points)	goal setting; points; levels; feedback; punishment	Reinforcement (rewards /points [weekly starting points]; punishment [point deduction], feedback [how many steps, including in control condition]); Performance (goal setting, assigned challenges: assigned vs. self-chosen goals; levels: blue, bronze, silver, gold)	Reinforcement (rewards /points [weekly starting points]; punishment [point deduction], feedback [how many steps, including in control condition]); Performance (goal setting, assigned challenges: assigned vs. self-chosen goals; levels: blue, bronze, silver, gold)	2		goal-setting theory; behavioral economics (loss aversion / Prospect Theory); fresh start effect	goal-setting theory	behavioral economics (loss aversion); fresh start effect	N/A	Goal-setting theory: specific and more challenging goals lead to better performance than nonspecific, easy goals. Moderating factors: attainability of goal, commitment to goal, feedback on performance, situational resources to achieve the goal.	Goal-setting theory	behavioral economics (loss aversion); fresh start effect	yes	N/A	24 weeks	change mean daily steps, change minutes of moderate to vigorous physical activity	points and levels that were run automatically given based on steps and provided daily feedback via text message on their progress. At the beginning of each week the participant received 70 points (10 for each day of that week). Not achieve their daily step goal, lose 10 points from their balance. At the end of each week, if the participant had at least 40 points, they moved up a level (levels fro…	Random assignment to to have step goals either assigned or self-chosen; goals were implemented either immediately or gradually. Participants wear devices and connect to an online account. Steps counted daily, feedback given next day. 8 week intervention introduction, 8 week maintenance intervention, 8 week follow up	RCT; longitudinal; survey; pre/post;	surveys, RCT, (bio-measures? daily steps from Fitbit), (previously established Way to Health platform)	surveys, RCT, (previously established Way to Health platform)	RCT; longitudinal; survey; pre/post;	development	no	no	The control arm had a mostly steady increase in physical activity from baseline. Three of the gamification arms (both arms with assigned goals and the arm with self-chosen and gradual goals) also had mostly steady increases in physical activity. The gamification arm with self-chosen and immediate goals had the largest increase in physical activity.	500	elicit
Effect of a Game-Based Intervention Designed to Enhance Social Incentives to Increase Physical Activity Among Families: The BE FIT Randomized Clinical Trial	Patel, M. S., Benjamin, E. J., Volpp, K. G., Fox, C. S., Small, D. S., Massaro, J. M., ... & Murabito, J. M. (2017). Effect of a game-based intervention designed to enhance social incentives to increase physical activity among families: the BE FIT randomized clinical trial. JAMA internal medicine, 177(11), 1586-1593. https://www.ncbi.nlm.nih.gov/pmc/articles/PMC5710273/	yes *same game as previous study* **uses way to health**	physical activity	teams, levels, points, rewards	goals; feedback; teams (family); points, punishment (loss of points, level down); levels; real-life reward (mug)	-	-	3		behavioral economics	N/A	behavioral economics; fresh start effect	-	-	-	-	yes	N/A	12 weeks; weekly	improve step count	study was conducted using Way to Health. Precommitmet agreement, start week specific # points, family keep/lose points based on reaching goals, level advancement based on points maintained, gift reward for level attained at end of the study. leveraging incentives within social networks to change health behaviors.	randomized control trial with family. Two hundred adults comprising 94 families were randomized and received an intervention.	RCT; longitudinal; surveys; pre/post;	-	-	RCT; longitudinal; surveys; pre/post;	development	no	no	The percentage increase in participant step goals from baseline was not significantly different between study arms. 97% percent of participants completed the entire 24-week study. The mean unadjusted proportions of participant-days that step goals were achieved during the intervention period were 0.32 in the control arm and 0.53 in the gamification arm. The proportion achieving step goals remaine…	200	elicit
Effectiveness of Behaviorally Designed Gamification Interventions With Social Incentives for Increasing Physical Activity Among Overweight and Obese Adults Across the United States: The STEP UP Randomized Clinical Trial.	Patel, M. S., Small, D. S., Harrison, J. D., Fortunato, M. P., Oon, A. L., Rareshide, C. A., ... & Hilbert, V. (2019). Effectiveness of behaviorally designed gamification interventions with social incentives for increasing physical activity among overweight and obese adults across the United States: the STEP UP randomized clinical trial. JAMA Internal Medicine, 179(12), 1624-1632. https://www.ncb…	yes -- same as other two? **uses way to health**	reduce BMI	points, levels, goal setting, collaboration, leader boards	goal setting; points (gain and loss); levels; progress notice; team; leaderboard	-	-	3		behavioral economics; prospect theory	N/A	prospect theory; behavioral economics; fresh start effect	-	-	-	-	yes	N/A	24 weeks	Increase average daily steps	3 month intervnetion, single site, and tested only 1 form of social incentive among family members. Used way to health application. Set end step goal at beginning of intervention. Precommitment pledge at beginning. Points awarded at beginning of week and lost if did not reach weekly goals. level ups/down at end of each week. In the support arm, participants were asked to identify a family member …	RCT. Track daily and weekly step count during intervention and follow up periods.	RCT; longitudinal; pre/post;	-	-	RCT; longitudinal; pre/post;	development	no	no	The gamification with competition arm had the highest physical activity levels during the entire trial; each other gamification arm had more average daily steps compared to the control (even during follow up). In the main adjusted model, compared with controls, participants had a significantly greater increase in mean daily steps from baseline in the competition arm, support arm, and collaboratio…	602	elicit
Effectiveness of a gamification strategy to prevent childhood obesity in schools: a cluster-randomized controlled trial	Peña, S., Carranza, M., Cuadrado, C., Parra, D. C., Villalobos Dintrans, P., Castillo, C., ... & Zitko, P. (2021). Effectiveness of a gamification strategy to prevent childhood obesity in schools: a cluster controlled trial. Obesity, 29(11), 1825-1834. https://doi.org/10.1002/oby.23165	yes	obesity	points, levels, badges, and leaderboards	points, activity tracker, challenge; leaderboard; badges; real world rewards; story, virtual environment; team (work with classmates and family)	-	-	4	Design Thinking approach	health behavior change, Behavioral Change Wheel framework	Design Thinking approach	Behavioral Change Wheel framework	-	-	-	-	yes	30 minutes	7 months; weekly	Prevent/reduce childhood obesity through school based intervention. Target health indicators: BMI, waist circumference, systolic [SBP] and diastolic blood pressure [DBP]	Title: Juntos Santiago. four components: Healthy Challenges of three types: Healthy Snacks Challenge (children collect points for bringing healthy snacks for school breaks), Steps Challenge (children are given an activity tracker), and Healthy Activity Challenge (children and their families collect points by uploading pictures of specific healthy activities defined by the research team); gamifica…	school-based, longitudinal cluster controlled trial with a 2:1 allocation ratio (intervention:control). designed the trial with the participation of school owners, principals, teachers, students, and public health and gamification experts. designed prototypes of the intervention components to test the assumptions and reduce implementation risks; tested participants interest; tested effectiveness.…	longitudinal; cluster randomized trial; interdisciplinary team; user feedback; prototype; biomeasures; pre/post	-	-	longitudinal; cluster randomized trial; interdisciplinary team; user feedback; prototype; biomeasures; pre/post	post development	no	yes	At 7 months, the intervention arm had lower BMI z score than the control arm after adjusting for school and individual covariates and baseline values. At 7 months, the waist circumference was similar between the intervention and control arms. At 7 months, students in the intervention arms experienced a reduction in their BMI compared with controls and SBP. DBP was similar between intervention and…		elicit
Effectiveness of a Text-Based Gamification Intervention to Improve Physical Activity Among Postpartum Individuals With Hypertensive Disorders of Pregnancy: A Randomized Clinical Trial.	Lewey, J., Murphy, S., Zhang, D., Putt, M. E., Elovitz, M. A., Riis, V., ... & Levine, L. D. (2022). Effectiveness of a text-based gamification intervention to improve physical activity among postpartum individuals with hypertensive disorders of pregnancy: a randomized clinical trial. JAMA cardiology, 7(6), 591-599. https://www.ncbi.nlm.nih.gov/pmc/articles/PMC9021982/	No - uses STEP UP, an established intervention, previous study covers this **uses way to health**	Physical activity, hypertension	points, levels, teams, leaderboards	goal setting; team; points (gain and lose); levels; feedback; real rewards; social pressure/accountability	Reinforcement (rewards: points, prize (onesie and water bottle for gold or silver at the end of study)]; punishment [point losses], feedback [daily texts about group performance]); Performance (goal setting [could adjust step goal at weeks 4 and 8 to keep game challenging], levels (bronze, silver, gold, platinum based on weekly totals)); Social (social/peer pressure [1 person represents team on a…	Reinforcement (rewards: points, prize (onesie and water bottle for gold or silver at the end of study)]; punishment [point losses], feedback [daily texts about group performance]); Performance (goal setting [could adjust step goal at weeks 4 and 8 to keep game challenging], levels (bronze, silver, gold, platinum based on weekly totals)); Social (social/peer pressure [1 person represents team on a…	3			N/A	behavioral economics; loss aversion theory; fresh start	N/A	behavioral economics: loss aversion	N/A	behavioral economics: loss aversion; fresh start	yes	N/A	12 weeks	improves physical activity in postpartum individuals with hypertensive disorders of pregnancy.	All participants received a wearable activity tracker, established a baseline step count, selected a step goal greater than baseline. team-based gamification intervention consisting of points and levels and leveraging the performance of other participants on the team.	N/A	RCT; longitudinal; pre/post;	surveys, RCT, (bio-measures? daily steps from Fitbit), (previously established Way to Health platform)	surveys, RCT, bio-measures (BMI, ASCVD related measures); (previously established Way to Health platform)	RCT; longitudinal; pre/post; surveys; biomeasures	post development	no	no	the mean step count difference between the intervention and control arms decreased over time, but participants in the intervention arm consistently had a higher step count compared with those in the control arm throughout the 12-week study. Across the 12 weeks of follow-up, participants in the intervention arm achieved their step goals on 47% of days compared with 38% for the control group. Among…	127	elicit
Remotely Monitored Gamification and Social Incentives to Improve Glycemic Control Among Adults With Uncontrolled Type 2 Diabetes (iDiabetes): Protocol for a Randomized Controlled Trial	Fortunato, M., Harrison, J., Oon, A.L., Small, D.S., Hilbert, V., Rareshide, C., & Patel, M. (2019). Remotely Monitored Gamification and Social Incentives to Improve Glycemic Control Among Adults With Uncontrolled Type 2 Diabetes (iDiabetes): Protocol for a Randomized Controlled Trial. JMIR Research Protocols, 8. https://doi.org/10.2196/14180	no - same as previous **uses way to health**	increase physical activity among overweight and obese adults with type 2 diabetes	levels, points, rewards, social support/competition/teams	goal setting; points (reward and punishment); levels; real world rewards; feedback, progress tracking; teams; leaderboard/ranking	-	-	3		Behavioral economics	N/A	behavioral economics	-	-	-	-	yes	N/A	1 year	encourage participants to lose weight	Participants randomized to 1 of the 3 gamification arms conducted goal setting during the in-person visit (selecting a HbA1c reduction goal, a weight loss goal); Weekly weight target, and if not achieved, the target remained the same for the following week; participants had a 4-week ramp up toward their daily step goal; they were then asked to maintain the 8000 steps per day goal for the remainde…	iDiabetes is a 4-arm randomized controlled trial with a 1-year intervention period. The trial was conducted using Way to Health	RCT; longitudinal; pre/post; qualitative survey; pilot study	-		RCT; longitudinal; pre/post; qualitative survey; pilot study	postdevelopment	yes	no	This trial has demonstrated that it is feasible to conduct a remotely monitored intervention -- no data analysis yet	361	elicit
Efficacy of gamification-based smartphone application for weight loss in overweight and obese adolescents: study protocol for a phase II randomized controlled trial	Timpel P, Cesena FHY, da Silva Costa C, et al. Efficacy of gamification-based smartphone application for weight loss in overweight and obese adolescents: study protocol for a phase II randomized controlled trial. Therapeutic Advances in Endocrinology and Metabolism. 2018;9(6):167-176. https://doi.org/10.1177/2042018818770938	yes - prototype	Adolescent Obesity	challenges, points	tracking; challenges; points; feedback	-	-	2		N/A	N/A		-	-	-	-	yes	N/A	6-month	Improve nutrition and phsyical activity. Track activity and food intake.	The application comprises tracking and monitoring functions using diaries of food intake, exercises and daily steps; elements of gamification: challenges and points systems, are used to promote healthy nutrition choices and exercises. Weekly reminder texts, monthly motivation interviews	The trial is designed to be a phase II, single-centre, two-arm, triple-blinded, randomized controlled trial (RCT) with a duration of 6 months. Measurements: effects of the gamification-based application on adherence, as well as on anthropometric, metabolic and behavioural changes.	RCT; longitudinal; biomeasures; questionnaire;	-		RCT; longitudinal; biomeasures; questionnaire; protoyping	predevelopment	no	no	no results yet	108	elicit
Evaluating the Impact of Adaptive Personalized Goal Setting on Engagement Levels of Government Staff With a Gamified mHealth Tool: Results From a 2-Month Randomized Controlled Trial	Nuijten R, Van Gorp P, Khanshan A, Le Blanc P, van den Berg P, Kemperman A, Simons M Evaluating the Impact of Adaptive Personalized Goal Setting on Engagement Levels of Government Staff With a Gamified mHealth Tool: Results From a 2-Month Randomized Controlled Trial JMIR Mhealth Uhealth 2022;10(3). https://doi.org/10.2196/28801	no - adapted already developed intervention	physical health	challenges, points, goals, progress visualizations, leaderboards, and rewards	challenges, points, goals, progress tracking, leaderboards, and rewards; personalization	-	-	4	Flow Theory	COM-B [Capability, Opportunity, and Motivation Model of Behavior] System and the Fogg Behavior Model; Theory of Planned Behavior; Self-Determination Theory	Flow Theory; Goal-Setting Theory;	Theory of Planned Behavior; Self-Determination Theory; apability, Opportunity, and Motivation Model of Behavior; Fogg Behavior Model; Transtheoretical Model of Behavior Change	-	-	-	-	yes	N/A	8-week	promote walks, bike rides, and sports sessions	8-week digital health promotion campaign. Using an mHealth app, participants could track their performance on two social leaderboards. GameBus was especially designed for health promotion and provides a highly configurable gamification engine that is used for sustaining participant engagement.	N/A	short intake survey; longitudinal; pre/post;	-		short intake survey; longitudinal; pre/post;	post development	no	no	The results indicated that engagement with the program inevitably dropped over time. However, engagement was higher for participants who had set themselves a goal in the intake survey. Personalization seems particularly promising for promoting the frequency of physical activity. the treatment group participants who set themselves a goal reported the lowest levels of self-efficacy on average among…	176	elicit
